# Supplementary material for: Cross-protection induced by Japanese encephalitis vaccines against different genotypes of Dengue viruses in mice
Source: PubMed Central journal article supplement (PMC4730143; doi:10.1038/srep19953), 2016-01-28
Supplement: srep19953-s1.pdf [file srep19953-s1.pdf]

**Cross-protection induced by Japanese encephalitis vaccines against different  
genotypes of Dengue viruses in mice**

Jieqiong Li<sup>1</sup>, Na Gao<sup>1</sup>, Dongying Fan<sup>1</sup>, Hui Chen<sup>1</sup>, Ziyang Sheng<sup>1</sup>, Shihong  
Fu<sup>2,3</sup>, Guodong Liang<sup>2,3</sup>, Jing An<sup>1,2,4</sup>

Supplementary Table1 The NAb titers to JEV, DENV2 or DENV3 in human subjects of  
each person vaccinated by JEV-INV

| No. INV | Neutralizing antibody titers |               |               |
|---------|------------------------------|---------------|---------------|
|         | JEV(PRNT90)                  | DENV2(PRNT50) | DENV3(PRNT50) |
| 1       | >1:320                       | 40            | 80            |
| 2       | >1:320                       | 20            | 40            |
| 3       | >1:320                       | 40            | 40            |
| 4       | >1:320                       | 40            | 40            |
| 5       | >1:320                       | 20            | 80            |
| 6       | 1:160                        | 160           | 40            |
| 7       | 1:160                        | 40            | 40            |
| 8       | 1:160                        | 20            | 40            |
| 9       | 1:160                        | 40            | 80            |
| 10      | 1:80                         | 20            | 40            |
| 11      | 1:80                         | 40            | 40            |
| 12      | 1:80                         | 80            | 40            |
| 13      | 1:80                         | 20            | 40            |
| 14      | 1:80                         | 80            | 80            |
| 15      | 1:80                         | 40            | 40            |
| 16      | 1:80                         | 40            | 40            |
| 17      | 1:80                         | 20            | 40            |
| 18      | 1:40                         | 80            | 40            |
| 19      | 1:40                         | 40            | 80            |
| 20      | 1:40                         | 40            | 40            |
| 21      | 1:40                         | 40            | 40            |
| 22      | 1:20                         | 40            | 40            |
| 23      | 1:20                         | 40            | 20            |
| 24      | 1:20                         | 40            | 320           |
| 25      | 1:20                         | 80            | 40            |

|                  |       |     |        |
|------------------|-------|-----|--------|
| 26               | 1:10  | 80  | 40     |
| 27               | 1:10  | 40  | 320    |
| 28               | <1:10 | 20  | 40     |
| 29               | <1:10 | 80  | 40     |
| 30               | <1:10 | 320 | 320    |
| GMT <sup>a</sup> | —     | 40  | 54.014 |

a: GMT geometric mean titer.

Supplementary Table 2 The NAb titers to JEV, DENV2 or DENV3 in human subjects

of each person vaccinated by JEV-LAV

| No. LAV          | Neutralizing antibody titers |               |               |
|------------------|------------------------------|---------------|---------------|
|                  | JEV(PRNT90)                  | DENV2(PRNT50) | DENV3(PRNT50) |
| 1                | >1:320                       | 80            | 160           |
| 2                | >1:320                       | 160           | 80            |
| 3                | >1:320                       | 80            | 20            |
| 4                | >1:320                       | 40            | 320           |
| 5                | >1:320                       | 20            | 20            |
| 6                | >1:320                       | 40            | 80            |
| 7                | >1:320                       | 40            | 80            |
| 8                | 1:160                        | 80            | 80            |
| 9                | 1:160                        | 80            | 80            |
| 10               | 1:160                        | 20            | 40            |
| 11               | 1:80                         | 40            | 40            |
| 12               | 1:80                         | 40            | 160           |
| 13               | 1:40                         | 40            | 320           |
| 14               | 1:40                         | 40            | 160           |
| 15               | 1:40                         | 80            | 320           |
| 16               | 1:20                         | 80            | 80            |
| 17               | 1:20                         | 80            | 160           |
| 18               | 1:20                         | 40            | 320           |
| 19               | 1:10                         | 80            | 80            |
| 20               | 1:10                         | 20            | 80            |
| 21               | <1:10                        | 80            | 80            |
| 22               | <1:10                        | 20            | 80            |
| GMT <sup>a</sup> | —                            | 40            | 96.64716      |

a: GMT geometric mean titer.
